1           **On the adaptive meaning of chemically insignificant cues in multitrophic**  
2                                   **caterpillar-ant-plant symbioses**

3

4   Luan Dias Lima<sup>1,2</sup>, Diego Santana Assis<sup>2</sup>, Fábio Santos do Nascimento<sup>2</sup> and Lucas  
5   Augusto Kaminski<sup>1,3\*</sup>

6

7   <sup>1</sup>Programa de Pós-graduação em Biologia Animal, Departamento de Zoologia,  
8   Universidade Federal do Rio Grande do Sul — UFRGS, 90650-001, Porto Alegre, RS,  
9   Brazil.

10   <sup>2</sup>Faculdade de Filosofia, Ciências e Letras de Ribeirão Preto, Departamento de Biologia,  
11   Universidade de São Paulo — USP, 14040-901, Ribeirão Preto, SP, Brazil.

12   <sup>3</sup>Núcleo de Ecologia e Biodiversidade, Instituto de Ciências Básicas e da Saúde,  
13   Universidade Federal de Alagoas — UFAL, 57072-900, Maceió, AL, Brazil.

14   ORCiDs: LDL, 000-0001-5414-3427; DSA, 0000-0002-8131-2617; FSN, 0000-0002-  
15   3731-7111; LAK, 0000-0002-6468-0960

16   Subject Category:

17   Behaviour

18   Subject Areas:

19   behaviour, ecology, evolution

20   \*Author for correspondence: Lucas A. Kaminski

21   Email: [lucaskaminski@yahoo.com.br](mailto:lucaskaminski@yahoo.com.br)

22           Ants use cuticular hydrocarbons (CHCs) as chemical cues for recognition, which  
23 are exploited by myrmecophiles to usufruct the benefits of the social habit. We aimed to  
24 identify the functional role of CHCs of two riodinid caterpillar species that obligately  
25 associate with different multitrophic ant-plant symbioses. Experiments of ant acceptance  
26 of caterpillars showed the concerted action of larval-ant-organs that produce liquid  
27 rewards (tentacle nectary organs, TNOs) and luring signals (anterior tentacle organs,  
28 ATOs) was key to ant appeasement and larval survival. Experiments changing the  
29 symbiosis were often lethal for the caterpillars, mainly after emptying the secretions of  
30 their TNOs and their ATOs were never activated. Chemical profiles of caterpillars were  
31 insignificant. Field bioassays with chemically insignificant palatable insect prey attracted  
32 fewer ants, indicating that insignificant cues may reduce the probability of ant attacks.  
33 Thus, caterpillars control the emission of signals of ant-organs during symbiosis, whereas  
34 the cues of CHCs are silenced. It is possible that a trade-off exists between signals under  
35 control and non-controlled cues. Chemical insignificance may allow for a crucial period  
36 for caterpillars to make tactical decisions to appease aggressive ants and could be  
37 extended to other communication channels according to the sensorial universe of the  
38 receiver.

39 **Keywords:** adaptive resemblance, biosemiotics, chemical transparency, defensive  
40 strategy, mutualism, myrmecophily

## 41 1. Background

42 Ants have existed since the Upper Cretaceous, approximately 100 million years ago, and  
43 constitute a dominant insect group in terms of abundance and biomass and are the main  
44 invertebrate predators in terrestrial ecosystems [1]. These insects, as with other eusocial  
45 insects, use intraspecific recognition systems and can distinguish between nestmates and  
46 non-nestmates using mainly chemical cues, namely compounds present in their cuticle  
47 called cuticular hydrocarbons (CHCs) (e.g. [2–4]). However, some organisms that  
48 interact with ants, i.e., myrmecophiles, can conceal information of chemical cues,  
49 allowing them to live with ants without being attacked and exploiting the benefits of the  
50 social habit, either protection, food, or shelter [1–2]. This intimacy and/or integration into  
51 ant nests and foraging territories on plants can be obtained through chemical strategies  
52 that include adaptive resemblance (such as mimicry, crypsis or masquerade) or not, such  
53 as chemical insignificance or conspicuousness [5–6].

54 Among adaptive resemblance strategies, chemical mimicry *sensu* [5] occurs when  
55 an organism is detected by a receiver (ant, in this case) as something interesting, resulting  
56 in action by the receiver. There are several examples of chemical mimicry strategy in the  
57 literature, mainly of social parasites that mimic the profiles of their host ants (e.g. [3,7–  
58 9]). These cases can be classified as aggressive mimicry (*sensu* [10]), since the emitter  
59 mimics the receiver to obtain benefits that directly harm the fitness of the receiver colony.  
60 Other strategies of adaptive resemblance include chemical crypsis, which occurs when  
61 the emitter organism is not detected due to the blending of its chemical cues with the  
62 background or chemical masquerade, when the organism is detected, but misidentified as  
63 something uninteresting, and thus not causing a reaction by the receiver [5]. These two  
64 kinds of strategies are broadly classified as chemical camouflage and have been reported  
65 for herbivorous insects as a way to reduce ant attacks (e.g. [6,11–14]).

66           Chemical insignificance occurs when an organism has few chemical cues due to  
67 the suppression or low concentration of cuticular compounds, which hampers its detection  
68 [5,15–16]. This strategy has been reported for some social parasitic ants and one  
69 caterpillar species (see [3,17]). Besides these strategies, ants can learn to recognise the  
70 CHC profiles of mutualistic partners, even when they are neither congruent with those of  
71 the ants nor the host plants, and thus avoid attacking them [18–20]. These non-congruent  
72 profiles may constitute conspicuousness strategy (*sensu* [6]).

73           Myrmecophilous butterflies (Lepidoptera: Lycaenidae and Riodinidae) live in  
74 association with ants during their immature stages (reviewed in [21]). In general, the ant-  
75 caterpillar interaction is trophobiotic, a kind of mutualistic interaction mediated by sugar-  
76 rich liquids that attract and serve as food resources for the ants, which in return offer  
77 protection against natural enemies or clean their partner caterpillars [1,20,22–23]. Such  
78 caterpillars use multimodal channels of communication to deal with ants, including  
79 tactile, chemical, and acoustic signalling, through morphological adaptations called ant-  
80 organs [22, 24–27]. Cues of CHCs can also mediate chemical strategies. Studies with the  
81 chemical profiles of myrmecophilous caterpillars with different kinds of interactions with  
82 ants (commensalism, mutualism, or parasitism), different degrees of specificity  
83 (facultative or obligate), and different feeding habits (herbivorous, omnivorous or  
84 carnivorous) have identified several kinds of chemical strategies (e.g. [6,17,28–29]).  
85 Thus, myrmecophilous caterpillars are excellent models for studying the ecology and  
86 evolution of different chemical strategies mediated by cuticular compounds [30].

87           Here, we assessed for the first time the chemical strategies mediated by CHCs of  
88 two caterpillar species of the family Riodinidae. Several species of this family engage in  
89 obligate trophobiotic interactions with ants (e.g. [31–32]), but the composition and  
90 function of the CHCs of these caterpillars are unknown. The studied species use similar

91 host plants but obligately interact with different aggressive ant species that are  
92 phylogenetically distant (figure 1). Thus, the aim of this study was to perform chemical  
93 analyses and experiments in the field to identify the functional role of the CHC profiles  
94 of these caterpillars. Studies with species in the sister family Lycaenidae showed that  
95 trophobiotic caterpillars (that produce caloric rewards) generally have conspicuous CHCs  
96 that may appease ant aggressiveness or be associated with resource availability [6,20,33].  
97 Based on this information, we hypothesised that the CHC profiles in the two caterpillar  
98 species would be informative to their respective tending ants and that, for this reason,  
99 they would be recognised as mutualistic partners and would not be attacked.

100

## 101 **2. Methods**

### 102 **(a) Study site and organisms**

103 The study was performed at the Serra das Araras Ecological Station (EESA) located in  
104 Porto Estrela (15°40'18" S; 57°13'47" W), state of Mato Grosso in the Center-West  
105 region of Brazil. The vegetation of EESA constitutes a transition between the Cerrado  
106 savanna and the Amazon forest [34–35]. The Amazon influence is stronger in the wetter  
107 areas of semideciduous forest and gallery forest and many caterpillar-ant-plant systems  
108 are typically Amazonian (e.g. [36]). Collections were carried out in the gallery forest of  
109 the Salobro river and Boca do José. Caterpillars were sampled in these sites by visually  
110 scanning vegetation. Sampling focused on two species of myrmecophilous butterflies  
111 abundant at EESA: *Juditha molpe* (Hübner, [1808]) and *Nymphidium chione* Bates, 1867  
112 (Lepidoptera: Riodinidae). The caterpillars of these butterflies are classified as obligate  
113 myrmecophilous; *J. molpe* lives in association with *Dolichoderus bispinosus* (Olivier,  
114 1792) (Dolichoderinae) and *N. chione* with *Pheidole biconstricta* Mayr, 1870

115 (Myrmicinae) (LAK, pers. observation) (figure 1). As observed for other obligate  
116 myrmecophilous riordinids, the caterpillars of *J. molpe* and *N. chione* are polyphagous  
117 throughout their geographic distribution, using mainly host plants bearing extrafloral  
118 nectaries [37–41]. The main host plants used by *J. molpe* and *N. chione* in areas of gallery  
119 forest at EESA are two species of *Inga* (Fabaceae). Plants of this genus have conspicuous  
120 extrafloral nectaries and attract many ants [42]. The ants, *D. bispinosus* and *P.*  
121 *biconstricta* (Myrmicinae), are top dominant ants in Neotropical forests and monopolise  
122 liquid food sources on vegetation [43–45]. In the study site, both species visit the  
123 extrafloral nectaries of *Inga* spp. but never occur together on the same plant (LAK,  
124 unpublished data).

125 Samples of the studied organisms were also collected for subsequent chemical  
126 analyses: *J. molpe* (first instar  $n = 6$ ; second instar  $n = 8$ ; third instar  $n = 3$ ; fourth instar  
127  $n = 2$ ; last instar  $n = 1$ ), *N. chione* (third instar  $n = 9$ ; fourth instar  $n = 4$ ; last instar  $n = 7$ ),  
128 *D. bispinosus* ( $n = 100$ ), *P. biconstricta* ( $n = 100$ ), *Inga* sp. 1 ( $n = 10$ ), and *Inga* sp. 2 ( $n$   
129  $= 10$ ). These samples were frozen and kept at about  $-20^{\circ}\text{C}$  until extraction of their  
130 cuticular compounds and subsequent chemical analyses.

131

## 132 (b) Experiments of ant acceptance of caterpillars

133 Experiments were performed on ant acceptance of caterpillars to assess the role of ant-  
134 organs in ant-caterpillar interactions and the obligatoriness of this symbiosis. The  
135 experiments were performed on host plants in the field and consisted of two parts. For the  
136 control (without changing the associated ant), final instar (fourth or fifth) caterpillars of  
137 *J. molpe* and *N. chione* were removed from their host plants and transferred to another  
138 host plant of the same species occupied by their associated ant, i.e. *J. molpe* with *D.*

139 *bispinosus* ( $n = 17$ ) and *N. chione* with *P. biconstricta* ( $n = 15$ ). For the treatment (change  
140 to the non-associated ant), the caterpillars were transferred to another host plant of the  
141 same species occupied by the non-associated ant species, i.e., *N. chione* with *D.*  
142 *bispinosus* ( $n = 15$ ) and *J. molpe* with *P. biconstricta* ( $n = 16$ ). All caterpillars were placed  
143 in small plastic pots with food, using careful manipulation with sterilized entomological  
144 tweezers, and being kept for 24 h without ants prior to carrying out the experiments. The  
145 caterpillars were then placed on plants in a manner that allowed the ants enough time to  
146 spontaneously find them. This practice was fundamental because quick movements  
147 and/or disturbances on the vegetation near the ants can immediately trigger aggressive  
148 responses from them, which would invalidate the acceptance trail.

149 The experimental plants (*Inga* spp.) were selected along a transect of  
150 approximately 1000 m based on plant species and presence of associated ants.  
151 Observations were made for 5 min, starting from the first contact between a worker ant  
152 and the placed caterpillar, which could occur after a variable amount of time. Behavioural  
153 responses were observed after these initial contacts and were classified at the end of the  
154 5 min into two categories: 1) acceptance: ants tending the caterpillars without biting while  
155 antennating the ant-organs, i.e., tentacle nectary organs (TNOs), and anterior tentacle  
156 organs (ATOs) are constantly activated as described in the ‘enticement and binding’  
157 process (*sensu* [25]); or 2) rejection: ants attacking the caterpillars with biting followed  
158 by recruitment of other ants. Each caterpillar and each plant were used only once in the  
159 experiments. Moreover, the action of ant-organs was observed *ad libitum* [46] during the  
160 acceptance experiments as well as their effects on the tending ants.

161

162 (c) **Chemical analyses**

163 The cuticular chemical composition of the studied ants, caterpillars, and host plants was  
164 assessed by extracting the compounds following [6] by immersing the samples for 5 min  
165 in 5 ml of hexane (99%, SupraSolv, Merck, Germany), followed by removal from hexane  
166 with entomological tweezers that were previously cleaned with hexane. Pools of about 10  
167 individuals (workers) per sample were used for tending ants, while for the caterpillars,  
168 one individual was used when it was in the last instar or a pool of up to five individuals  
169 when they were from first to the fourth instar. The cuticular compounds of the host plants  
170 were extracted following the same steps as for the insects, but with 20 ml of hexane. Each  
171 obtained extract was later evaporated under a fume hood and stored at  $-20^{\circ}\text{C}$  until the  
172 moment of analyses when they were redissolved in hexane (95%, *n*-hexane, Macron,  
173 USA) and subsequently submitted to sonic baths.

174 All samples were analysed in a combined gas chromatography-mass spectrometer  
175 GC-MS (GC-QP2010 Plus, Shimadzu, Japan) equipped with a silica capillary column  
176 and using helium as a carrier gas following [47]. The conditions of the analyses were:  
177 injection performed manually with 2  $\mu\text{L}$  using a glass syringe; splitless injection; oven  
178 temperature initially set at  $150^{\circ}\text{C}$  increasing  $3^{\circ}\text{C}/\text{min}$  until reaching  $250^{\circ}\text{C}$ , which was  
179 maintained for 10 min; injector temperature of  $220^{\circ}\text{C}$ ; temperatures of detectors and  
180 transfer lines were  $250^{\circ}\text{C}$  and  $200^{\circ}\text{C}$ , respectively; ionization energy of 70 eV and a range  
181 of 40–600 amu, with a scanning interval of 0.3 s.

182 Data were analysed with GC-MS software for Windows (Shimadzu Corporation),  
183 and the compounds were identified based on their mass spectra and with the aid of a  
184 standard solution (Sigma-Aldrich Chemical Co., USA) with synthetic linear  
185 hydrocarbons from  $\text{C}_{21}$  to  $\text{C}_{40}$ , as well as by consulting the Wiley and NIST Libraries  
186 database. Compounds that were present in less than half of the individuals belonging to a



187 group, and compounds contributing less than 0.5% to the total compounds, were excluded  
188 from the analyses.

189

190 **(d) Bioassays with chemically significant and insignificant model prey**

191 Our initial hypothesis was that the cuticular compounds of the caterpillars would be  
192 informative (i.e. their own chemical signature) and, for this reason, they would be  
193 recognised and would not be attacked by the ant species they interact. However, the  
194 chemical analyses suggested that these caterpillars are chemically insignificant (see  
195 Results). Thus, we aimed to test the adaptive value of the chemical insignificance in the  
196 myrmecophily by performing field bioassays to examine the behavioural responses of the  
197 two ant species to the cuticular compounds of larvae of *Tenebrio molitor* Linnaeus, 1758  
198 (Coleoptera: Tenebrionidae) a model of a palatable insect prey to be offered to the ants.  
199 We hypothesised that the chemically insignificant larvae would be less attractive and  
200 recognised as potential prey, reducing attack time and probability. The larvae used were  
201 previously killed by freezing at  $-20^{\circ}\text{C}$  and had a drop of hexane dripped on the cuticle  
202 (control) (chemically significant, with their normal CHCs) or that had their cuticular  
203 compounds extracted by hexane during 10 min at room temperature (treatment)  
204 (chemically insignificant, with reduction of CHCs). According to [48], the time of 10 min  
205 was sufficient to remove virtually all CHCs of *Blattella germanica* (Linnaeus, 1767)  
206 (Blattellidae) nymphs also working for Lepidoptera caterpillars [12].

207 The larvae were glued with white glue on leaves of removed branches of the *Inga*  
208 host plants of the studied caterpillars. Entomological tweezers, cleaned with hexane, were  
209 used to manipulate the larvae. The larvae were placed inside a small polystyrene foam  
210 cooler with rigid refrigerant bottles and kept cold until the moment of the bioassays. The

211 removed branches with the experimental glued larvae were offered on the ground, at the  
212 base of the plants where ants were foraging, such that the ants could spontaneously find  
213 them. Pairs of control and treatment larvae were offered simultaneously, at a distance of  
214 at least 30 cm to avoid the recruitment effect of one larva on the other. A video of 5 min  
215 was recorded for each bioassay using a camera (Handycam Hdr-CX405 HD, Sony,  
216 Japan), starting from the first contact between a worker ant and the glued larva. The  
217 videos were later analysed and the total number of ants that touched a larva until the end  
218 of the bioassay was registered. Thirty replicates of this bioassay were performed (15 for  
219 each ant species).

220

#### 221 (e) **Statistical analyses**

222 The behavioural responses of the ants in the caterpillar acceptance experiments  
223 were assessed by performing the chi-square test ( $\chi^2$ ) for comparison (or heterogeneity)  
224 between the proportions of the total number of caterpillars being accepted or rejected  
225 (control and treatment). The tested hypothesis was that the proportion of caterpillars  
226 accepted and rejected did not differ significantly between the control and treatment  
227 according to ant species.

228 The videos of the bioassays with chemically significant and chemically  
229 insignificant larvae were analysed by a Recruitment Index (RI) of the ants modified from  
230 [12]. The RI (mean  $\pm$  SE) was calculated as the percentage of ants that touched larvae of  
231 the total number of ants recruited for the larvae (control and treatment) during 5 min.  
232 With the total number of ants recruited the RI was calculated as follows:

233

$$\text{RI} = (\text{TL}/\text{TL}+\text{CL}).100;$$

234 where RI is the Recruitment Index; TL is the number of ants that touched the treatment  
235 larva and; CL is the number of ants that touched the control larva. Thus, RIs values of 50  
236 or near 50 indicate no difference in the recruitment between control and treatment, those  
237 higher than 50 indicate higher recruitment for treatment larva, and those lower than 50  
238 indicate higher recruitment for control larva.

239 Moreover, the chi-square test ( $\chi^2$ ) was also performed, as previously mentioned,  
240 for the bioassay videos of chemically significant larvae (with CHCs) and chemically  
241 insignificant larvae (with reduction of CHCs), but without subtracting 0.5 and comparing  
242 the total number of recruited ants for larvae (control and treatment). The hypothesis tested  
243 was that the proportion of ants recruited did not differ significantly between the control  
244 and treatment according to ant species.

245 We followed the methodology of [6] the percentages of absolute abundance of the  
246 cuticular compound extracts were calculated considering them as 100%. These data were  
247 then used to calculate the quantity of each separate compound (relative abundance)  
248 expressed as a percentage of the total occurrence of a class of substance. A principal  
249 component analysis (PCA) was performed using these data to verify similarities or  
250 differences among them. All analyses were performed using R environment [49].

251

### 252 **3. Results**

#### 253 **(a) Experiments of ant acceptance of caterpillars**

254 The caterpillar acceptance experiments (control) showed that *J. molpe* and *N. chione* are  
255 almost always accepted by their associated ants when transferred to another host plant  
256 (figures 1 and 2a), i.e., the caterpillars successfully appeased the ants. There was no

257 heterogeneity regarding ant species, which means they had similar behavioural responses  
258 considering the caterpillars.

259         The caterpillars used the concerted action of their ant-organs to appease the  
260 tending ants. The ants did not recognise the caterpillars immediately, only when they  
261 antennated the region near the ant-organs. The TNOs were promptly everted after rapid  
262 antennation (palpation), liberating a drop of secretion that was imbibed by the ants. After  
263 this first contact with the TNOs, ants started being recruited and the ATOs were everted.  
264 The action of this organ promoted excitement in the ants, which started “protecting” the  
265 caterpillar and reestablishing the symbiosis (figures 1*c,f*).

266         On the other hand, there was a significant difference between the aforementioned  
267 controls and treatments ( $\chi^2 = 35.41$ ;  $df = 1$ ;  $p < 0.001$ ) for the experiments transferring  
268 caterpillars (treatment) between plants occupied with different ant species, which was  
269 often lethal for the two caterpillar species (figure 2). As in the control group, the  
270 caterpillars were firstly ignored until the ants found the TNOs. The, the antennating  
271 resulted in a drop of nectar being secreted that was imbibed by the ant. This appeasement  
272 lasted for a short amount of time, until the emptying of the secretions from the TNOs or  
273 when the ants antennated the region near the ATOs, which were never everted during the  
274 treatments. The emptying of the secretions of the TNOs seemed to result in more  
275 inspection of the caterpillar by the ants followed by biting. From this moment on, the ants  
276 started attacking the caterpillars and recruiting other ants (figures 2*b,d*). During the time  
277 that these experiments lasted, nearly all the caterpillars were killed. For *J. molpe*  
278 caterpillars with *P. biconstricta* (treatment), even soldiers with their robust mandibles,  
279 and who do not usually climb the plants, were recruited to help tear the caterpillars apart.

280

281 **(b) Chemical analyses**

282 Samples of the caterpillars showed very low concentrations of CHCs, and so an extract  
283 was performed with all previously used samples totalling 20 caterpillars of each species  
284 to identify the compounds that remained in very low concentrations (electronic  
285 supplementary material, figure S1, table S1). The compounds identified in these extracts  
286 were mainly *n*-alkanes (C<sub>25</sub>–C<sub>29</sub>) for *J. molpe* and (C<sub>21</sub>–C<sub>31</sub>) for *N. chione* (electronic  
287 supplementary material, figure S1, table S1). The compounds identified in the ants were  
288 in a much greater quantity and concentration, with branched alkanes being the main  
289 compounds (electronic supplementary material, figure S1, table S1). There were  
290 significant differences between the cuticular compounds of the two species of caterpillars  
291 ( $p < 0.001$ ) and also between those of caterpillars and ants ( $p < 0.001$ ) (electronic  
292 supplementary material, figure S2). The compounds of the plants were not identified as  
293 they were visually much very and in a much greater quantity and concentration than those  
294 of the caterpillars, which shows that the caterpillars are not chemically camouflaged  
295 (electronic supplementary material, figure S1).

296

297 **(c) Bioassays with chemically significant and insignificant model prey**

298 There were differences in the recruitment of *D. bispinosus* and *P. biconstricta* to *T.*  
299 *molitor* larvae between control and treatment with a tendency for more ant to recruitment  
300 to larvae with CHCs (control):  $19.93 \pm 3.92$  for *D. bispinosus* on control and  $10.6 \pm 2.8$   
301 on treatment;  $64.13 \pm 15.87$  for *P. biconstricta* on control and  $50.73 \pm 14.26$  on treatment  
302 ( $\chi^2 = 53.31$ ;  $df = 13$ ;  $p < 0.001$ ) (figure 3).

303 However, there was heterogeneity regarding ant species ( $\chi^2 = 406.76$ ;  $df = 13$ ;  $p$   
304  $< 0.001$ ). There was higher recruitment of *D. bispinosus* for larvae of *T. molitor* with

305 CHCs than to larvae with reduced CHCs ( $RI = 35.21 \pm 6.82$ ) and there was a clear  
306 tendency for higher recruitment to larvae with CHCs ( $\chi^2 = 42.79$ ;  $df = 14$ ;  $p < 0.001$ )  
307 (figure 3a).

308 The recruitment of *P. biconstricta* was also higher for larvae with CHCs than those  
309 with reduced CHCs ( $RI = 43.45 \pm 5.95$ ), however, there was not a clear tendency for  
310 higher recruitment to larvae with CHCs (figure 3b).

311

#### 312 **4. Discussion**

313 The studied caterpillar species were generally accepted by their associated tending ants  
314 and killed when they were transferred to host plants occupied by non-associated ants.  
315 Experiments changing myrmecophilous riodinid caterpillars from their associated ants  
316 have demonstrated that they may be accepted by some ant species, but sometimes  
317 attacked by others [31,50–51]. In these studies, failure in signalling has been proposed as  
318 a factor that could trigger the observed negative reactions, a hypothesis that is  
319 corroborated by the experiments of the present study as the caterpillars controlled the  
320 emission of specific signals from their ant-organs. There is evidence that ants use CHCs  
321 to recognise nestmates and non-nestmates and attack species with which they do not have  
322 mutualistic interactions (e.g. [1,15,52]). It has been shown that some CHCs of caterpillars  
323 associated with many ant species (facultative myrmecophily) may trigger aggressive  
324 responses or appeasement in different ant species [8].

325 The caterpillars studied here are presumed to have mutualistic interactions with  
326 ants, so our initial hypothesis that caterpillars would have informative CHC profiles, as  
327 reported for other trophobiotic species (e.g. [6,18–20]), was not confirmed. The strategies  
328 of chemical mimicry and chemical camouflage were discarded due to the low

329 concentrations and number of compounds and incongruence with the CHC profiles of the  
330 ants or host plants. Moreover, the present study demonstrates, through chemical analyses,  
331 that the caterpillars use the chemical insignificance strategy, thus silencing their cuticular  
332 chemical cues. Chemical insignificance has been reported as an effective strategy to  
333 decrease recognition and attacks by ants [3,5,15]. This strategy has been commonly  
334 reported for several ant parasite taxa, i.e., ants, arachnids, isopods, collembolans,  
335 coleopterans, dipterans, gastropods, and zygentomans [3 and references therein,8,53–55].  
336 Within Lepidoptera, this strategy has already been reported for the pupa of *Feniseca*  
337 *tarquinius* (Fabricius, 1793) [28] and the caterpillar of *Arhopala zylda* Corbet, 1941 [17].  
338 However, the adaptive basis of this chemical insignificance has never been tested and  
339 continues to be a little-understood phenomenon among myrmecophilous organisms.

340         In the present study, caterpillars were observed using their ant-organs when  
341 discovered by ants. Glands that produce caloric rewards (TNOs) were active regardless  
342 of the tending ant species. However, other factors, such as luring signals from caterpillar  
343 ATOs, may have influenced associated ants not to attack during the trials but were not  
344 used with non-associated ants. The concerted use of ant-organs was also observed for the  
345 riodinid caterpillar *Thisbe irenea* (Stoll, 1780), which could appease associated ants yet  
346 never evert ATOs when attacked [25].

347         The myrmecophilous riodinid species of the subtribes Lemoniadina and  
348 Nymphidiina (*sensu* [56]) have TNOs that secrete nutritional substances and ATOs that  
349 are everted during symbiotic interactions with ants [25,57–59]. According to [17], the  
350 caterpillars of *Arhopala* (Lycaenidae) generally have dorsal nectary organs (DNOs) that  
351 produce nectar rewards analogous to the TNOs in riodinid caterpillars, posterior tentacle  
352 organs (TOs) analogous to ATOs in riodinid caterpillars [51], and pore cupola organs  
353 (PCOs) that supposedly produce substances that decrease attacks by the ant

354 *Crematogaster decamera* Forel, 1910. Indeed, other authors have shown that DNO  
355 secretions from lycaenids can appease ants [60].

356         The chemical insignificance strategy has arisen independently in the two butterfly  
357 families of species with trophobiotic caterpillars on plants, as well as in other  
358 myrmecophiles with social parasitic lifestyles [3,17,28]. In addition to chemical analysis,  
359 the results of the field bioassays show that the removal of CHCs decreases the recruitment  
360 of ants to a palatable model insect, which suggests a possible adaptive value of the  
361 chemical insignificance in this case by allowing a crucial period of time for the caterpillar  
362 to decide on tactics to use to appease aggressive ants. This can be added to the fact that  
363 ants will even prey on mutualistic aphids when they do not secrete sugar-rich liquids (e.g.  
364 [61–62]). In the present study, caterpillars that were transferred to another host plant were  
365 attacked and killed by non-associated tending ants. This suggests that other factors must  
366 be acting in the establishment of stable caterpillar-ant symbioses, but reinforces the  
367 importance of a chemical strategy for caterpillars to keep close to aggressive ants and  
368 avoid recognition as prey, thereby reducing the possibility of attacks. Caterpillars of the  
369 present study were also observed using secretions as a way to keep close and appease  
370 ants, as well as avoid attacks, which worked only with their associated ant partner.  
371 Something similar was observed by [17], when *Arhopala* caterpillars were transferred to  
372 other plants, although different for *A. zylida* which also used the chemical insignificance  
373 strategy and was ignored by ants. The riodinids studied here may use the same tactics as  
374 *Arhopala* caterpillars as they also have ant-organs and secrete nectar rewards for  
375 aggressive associated ants to avoid attacks.

376         According to [25] the ATO chemistry is important for caterpillars to be accepted  
377 by certain species of ants and it does not function with others that kill them. This could  
378 be related to chemical signals that are specific to their associated ants and do not work



379 with ants from different subfamilies as they may have coevolved. This is because there  
380 are chemical cues that can provide information unintentionally and can act directly as  
381 precursors for the evolution of chemical signals that evolved due to a specific effect,  
382 providing information intentionally, and work because the receiver's response also  
383 evolved [63–64]. Thus, understanding the difference between cues and signals is essential  
384 to understanding the role of CHCs in myrmecophilous systems as cues and signals can  
385 act simultaneously [64] and can interfere with the fitness of myrmecophiles.

386         The present study found an expression of chemical signals from ant-organs that  
387 are intentional, however, the cuticular chemical cues do not allow this expression. The  
388 results reveal a possible trade-off between controlled signals and non-controlled cues in  
389 obligate multitrophic caterpillar-ant-plant symbioses. In this context, the insignificance  
390 of chemical cues may be adaptive in multitrophic interactions that involve complex  
391 multimodal signals by avoiding deaths in unpleasant encounters with non-associated ants.

392         The insignificance of chemical cues is a strategy that could be extended to other  
393 channels of communication according to the sensorial universe of the receiver and the  
394 degree of intimacy of the interaction. Caterpillars use a multimodal system to deal with  
395 ants [27], but this was not evaluated in the present study. For example, the apparent loss  
396 of the ability to produce sounds by caterpillars of some species of *Nymphidium* (see [26])  
397 may be related to selection for cue insignificance. Another remaining question is whether  
398 chemical insignificance can also decrease attacks of other natural enemies such as  
399 chemically oriented predators and parasitoids.

400

401 **Ethics.** The collection and transport of the specimens were authorised by Sistema de  
402 Autorização e Informação em Biodiversidade (SISBIO) (licence no. 62345-1).

403 **Data Accessibility.** The data that support the findings of this study are openly available  
404 on Figshare [65]. Supplementary information is provided in the electronic supplementary  
405 material [66].

406 **Authors' contributions.** L.D.L.: conceptualization, data curation, formal analysis,  
407 funding acquisition; investigation; methodology; software; validation; visualization;  
408 writing – original draft; writing – review & editing; D.S.A.: data curation; formal  
409 analysis; software; validation; visualization; writing – review & editing; F.S.N.: funding  
410 acquisition; investigation; project administration; resources; supervision; validation;  
411 visualization; writing – review & editing; L.A.K.: conceptualization; data curation;  
412 funding acquisition; investigation; methodology; project administration; resources;  
413 supervision; validation; visualization; writing – original draft; writing – review & editing.  
414 All authors gave final approval for publication and agree to be held accountable for the  
415 work performed therein.

416 **Conflict of interest declaration.** We declare we have no conflicts of interest.

417 **Funding.** This research was supported by São Paulo Research Foundation (FAPESP) to  
418 LDL (grant no. 2021/00984-7), DSA (grant no. 2015/17358-0), and FSN (grant no.  
419 2021/05598-8). This study was funded by Coordenação de Aperfeiçoamento de Pessoal  
420 de Nível Superior – Brasil (CAPES) to LDL and LAK – Finance Code 001 and Conselho  
421 Nacional de Desenvolvimento Científico e Tecnológico (CNPq) to FSN (grant no.  
422 2018/10996-0). This study was partially funded by National Geographic Society to LAK  
423 (grant no. #WW-224R-17).

424 **Acknowledgments.** We are grateful to: Marcelo L. F. Andrade (ESEC Serra das Araras)  
425 for permission and logistic support during fieldwork; Izabel C. C. Turatti for the  
426 assistance with identification of chemical compounds; Helena P. Romanowski for help

427 with statistical analyses; Ana Paula Goetz for assistance in the field; Joaquim Movia and  
428 Luísa L. Mota for the butterfly photos; Hélio S. Júnior for the beautiful caterpillar-ant  
429 macrophotographs; and Erik R. Wild for revising the English text. We especially thank  
430 Thiago J. Izzo and students Brayan R. Massaroli, Carolina Nardes, Kamila P. Thomas,  
431 Renata S. Souza and Thais Conceição of the course Ecologia de Campo (2017) of the  
432 PPG-Ecologia e Conservação da Biodiversidade of the Universidade Federal de Mato  
433 Grosso for the opportunity to get to know the ecological station and assistance with the  
434 acceptance experiments.

435

## 436 **References**

- 437 1. Hölldobler B, Wilson EO. 1990 *The ants*. Cambridge, USA: The Belknap Press  
438 of Harvard University Press.
- 439 2. Singer TL. 1998 Roles of hydrocarbons in the recognition systems of insects. *Am.*  
440 *Zool.* **38**, 394–405. (doi:10.1093/icb/38.2.394)
- 441 3. Lenoir A, D'Ettorre P, Errard C, Hefetz A. 2001 Chemical ecology and social  
442 parasitism in ants. *Annu. Rev. Entomol.* **46**, 573–599.  
443 (doi:10.1146/annurev.ento.46.1.573)
- 444 4. Brandstaetter AS, Endler A, Kleineidam CJ. 2008 Nestmate recognition in ants is  
445 possible without tactile interaction. *Naturwissenschaften* **95**, 601–608.  
446 (doi:10.1007/s00114-008-0360-5)
- 447 5. von Beeren C, Pohl S, Witte V. 2012 On the use of adaptive resemblance terms  
448 in chemical ecology. *Psyche* **2012**, 635761. (doi:10.1155/2012/635761)

- 449 6. Lima LD, Trigo JR, Kaminski LA. 2021 Chemical convergence between a guild  
450 of facultative myrmecophilous caterpillars and host plants. *Ecol. Entomol.* **46**, 66–  
451 75. (doi: 10.1111/een.12941)
- 452 7. Akino T, Knapp JJ, Thomas JA, Elmes GW. 1999. Chemical mimicry and host  
453 specificity in the butterfly *Maculinea rebeli*, a social parasite of *Myrmica* ant  
454 colonies. *Proc. R. Soc. B* **266**, 1419–1426. (doi: 10.1098/rspb.1999.0796)
- 455 8. Maruyama M, Akino T, Hashim R, Komatsu T. 2009 Behavior and cuticular  
456 hydrocarbons of myrmecophilous insects (Coleoptera: Staphylinidae; Diptera:  
457 Phoridae; Thysanura) associated with Asian *Aenictus* army ants (Hymenoptera;  
458 Formicidae). *Sociobiology* **54**, 19–35.
- 459 9. Casacci LP, Schönrogge K, Thomas JA, Balletto E, Bonelli S, Barbero F. 2019  
460 Host specificity pattern and chemical deception in a social parasite of ants. *Sci.*  
461 *Rep.* **9**, 1619. (doi:10.1038/s41598-018-38172-4)
- 462 10. Ruxton GD, Sherratt TN, Speed MP. 2004 *Avoiding attack: the evolutionary*  
463 *ecology of crypsis, warning signals and mimicry*. New York, USA: Oxford  
464 University Press.
- 465 11. Akino T, Nakamura K-i., Wakamura S. 2004 Diet-induced chemical  
466 phytomimesis by twig-like caterpillars of *Biston robustum* Butler (Lepidoptera:  
467 Geometridae). *Chemoecology* **14**, 165–174. (doi:10.1007/s00049-004-0274-4)
- 468 12. Portugal AHA, Trigo JR. 2005 Similarity of cuticular lipids between a caterpillar  
469 and its host plant: a way to make prey undetectable for predatory ants?. *J. Chem.*  
470 *Ecol.* **31**, 2551–2561. (doi:10.1007/s10886-005-7613-y)
- 471 13. Silveira HCP, Oliveira PS, Trigo JR. 2010 Attracting predators without falling  
472 prey: chemical camouflage protects honeydew-producing treehoppers from ant  
473 predation. *Am. Nat.* **175**, 261–268. (doi:10.1086/649580)

- 474 14. Lima LD, Kaminski LA. 2019 Camouflage. In *Encyclopedia of animal cognition*  
475 *and behavior* (eds J Vonk, T Shackelford), pp. 1–9. Cham, Switzerland: Springer  
476 Nature. (doi: 10.1007/978-3-319-47829-6\_698-1)
- 477 15. Lenoir A, Fresneau D, Errard C, Hefetz A. 1999 Individuality and colonial  
478 identity in ants: the emergence of the social representation concept. In *Information*  
479 *processing in social insects* (eds C Detrain, JL Deneubourg, JM Pasteels), pp.  
480 219–237. Basel, Switzerland: Birkhäuser Verlag.
- 481 16. Lorenzi MC, d'Ettorre P. 2020. Nestmate recognition in social insects: what does  
482 it mean being chemically insignificant?. *Front. Ecol. Evol.* **7**, 488.  
483 (doi:10.3389/fevo.2019.00488)
- 484 17. Inui Y, Shimizu-kaya U, Okubo T, Yamsaki E, Itioka T. 2015 Various chemical  
485 strategies to deceive ants in three *Arhopala* species (Lepidoptera: Lycaenidae)  
486 exploiting *Macaranga* myrmecophytes. *Plos One* **10**, e0120652.  
487 (doi:10.1371/journal.pone.0120652)
- 488 18. Lang C, Menzel F. 2011 *Lasius niger* ants discriminate aphids based on their  
489 cuticular hydrocarbons. *Anim. Behav.* **82**, 1245–1254.  
490 (doi:10.1016/j.anbehav.2011.08.020)
- 491 19. Endo S, Itino T. 2012 The aphid-tending ant *Lasius fuji* exhibits reduced  
492 aggression toward aphids marked with ant cuticular hydrocarbons. *Popul. Ecol.*  
493 **54**, 405–410. (doi:10.1007/s10144-012-0314-9)
- 494 20. Hojo MK, Yamamoto A, Akino T, Tsuji K, Yamaoka R. 2014 Ants use partner  
495 specific odors to learn to recognize a mutualistic partner. *Plos One* **9**, e86054.  
496 (doi:10.1371/journal.pone.0086054).

- 497 21. Pierce NE, Dankowicz E. 2022 The natural history of caterpillar-ant associations.  
498 In *Caterpillars in the Middle* (eds RJ Marquis, S Koptur), pp. 319–391. Cham,  
499 Switzerland: Springer. (doi:10.1007/978-3-030-86688-4\_11)
- 500 22. Fiedler K, Hölldobler B, Seufert P. 1996 Butterflies and ants: the communicative  
501 domain. *Experientia* **52**, 14–24. (doi:10.1007/BF01922410)
- 502 23. Stadler B, Dixon AFG. 2008 *Mutualism: ants and their insect partners*.  
503 Cambridge, UK: Cambridge University Press.  
504 (doi:10.1017/CBO9780511542176)
- 505 24. Malicky H. 1970 New aspects on the association between lycaenid larvae  
506 (Lycaenidae) and ants (Formicidae, Hymenoptera). *J. Lepid. Soc.* **24**, 190–202.
- 507 25. DeVries PJ. 1988 The larval ant-organs of *Thisbe irenea* (Lepidoptera:  
508 Riodinidae) and their effects upon attending ants. *Zool. J. Linn. Soc.* **94**, 379–393.  
509 (doi:10.1111/j.1096-3642.1988.tb01201.x)
- 510 26. DeVries PJ. 1991 Call production by myrmecophilous riodinid and lycaenid  
511 butterfly caterpillars (Lepidoptera): morphological, acoustical, functional, and  
512 evolutionary patterns. *Am. Mus. Novit.* **3025**, 1–23.
- 513 27. Casacci LP, Bonelli S, Balletto E, Barbero F. 2019 Multimodal signaling in  
514 myrmecophilous butterflies. *Front. Ecol. Evol.* **7**, 454.  
515 (doi:10.3389/fevo.2019.00454)
- 516 28. Lohman DJ, Liao Q, Pierce NE. 2006 Convergence of chemical mimicry in a guild  
517 of aphid predators. *Ecol. Entomol.* **31**, 41–51. (doi:10.1111/j.0307-  
518 6946.2006.00758.x)
- 519 29. Morozumi Y, Murakami T, Watanabe M, Ohta S, Ômura H. 2019 Absence of  
520 cuticular alkenes allows lycaenid larvae to avoid predation by *Formica japonica*  
521 ants. *Entomol. Sci.* **22**, 126–136. (doi:10.1111/ens.12342)

- 522 30. Barbero F. 2016 Cuticular lipids as a cross-talk among ants, plants and butterflies.  
523 *Int. J. Mol. Sci.* **17**, 1966. (doi:10.3390/ijms17121966)
- 524 31. Kaminski LA. 2008 Polyphagy and obligate myrmecophily in the butterfly  
525 *Hallonympha paucipuncta* (Lepidoptera: Riodinidae) in the Neotropical Cerrado  
526 savanna. *Biotropica* **40**, 390–394. (doi: 10.1111/j.1744-7429.2007.00379.x)
- 527 32. Kaminski LA, Mota LL, Freitas AVL, Moreira GRP. 2013 Two ways to be a  
528 myrmecophilous butterfly: natural history and comparative immature-stage  
529 morphology of two species of *Theope* (Lepidoptera: Riodinidae). *Biol. J. Linn.*  
530 *Soc.* **108**, 844–870. (doi: 10.1111/bij.12014)
- 531 33. Mizuno T, Hagiwara Y, Akino T. 2018 Chemical tactic of facultative  
532 myrmecophilous lycaenid pupa to suppress ant aggression. *Chemoecology* **28**,  
533 173–182. (doi:10.1007/s00049-018-0270-8)
- 534 34. Valadão RM. 2012 As aves da Estação Ecológica Serra das Araras, Mato Grosso,  
535 Brasil. *Biota Neotrop.* **12** 263–281. (doi:10.1590/S1676-06032012000300026)
- 536 35. Instituto Chico Mendes de Conservação da Biodiversidade (ICMBio). 2016 *Plano*  
537 *de manejo da Estação Ecológica da Serra das Araras*. Brasília, DF, Brazil:  
538 Ministério do Meio Ambiente.
- 539 36. Kaminski LA, Lima LD. 2019 Larval omnivory in the myrmecophilous butterfly  
540 *Setabis lagus lagus* (Riodinidae: Nymphidiini). *J. Lepid. Soc.* **73** 276–279.  
541 (doi:10.18473/lepi.73i4.a4)
- 542 37. Callaghan CJ. 1982 Notes on the immature biology of two myrmecophilous  
543 Lycaenidae: *Juditha molpe* (Riodininae) and *Panthiades bitias* (Lycaeninae). *J.*  
544 *Res. Lepid.* **20**, 36–42.

- 545 38. DeVries PJ, Chacon IA, Murray D. 1992 Toward a better understanding of host  
546 use and biodiversity in riordinid butterflies (Lepidoptera). *J. Res. Lepid.* **31**, 103–  
547 126.
- 548 39. Hall JP, Harvey DJ. 2001 A phylogenetic analysis of the Neotropical riordinid  
549 butterfly genera *Juditha*, *Lemonias*, *Thisbe* and *Uraneis*, with a revision of *Juditha*  
550 (Lepidoptera: Riordinidae: Nymphidiini). *Syst. Entomol.* **26**, 453–490. (doi:  
551 10.1046/j.0307-6970.2001.00161.x)
- 552 40. Beccaloni GW, Vilorio AL, Hall SK, Robinson GS. 2008 *Catalogue of the*  
553 *hostplants of the Neotropical butterflies/Catálogo de las plantas huésped de las*  
554 *mariposas neotropicales, vol. 8*. Zaragoza, Spain: M3M–Monografías Tercer  
555 Milenio.
- 556 41. Hall JPW. 2018 *A monograph of the Nymphidiina (Lepidoptera: Riordinidae:*  
557 *Nymphidiini): phylogeny taxonomy, biology, and biogeography*. Washington,  
558 D.C., USA: The Entomological Society of Washington.
- 559 42. Bixenmann RJ, Coley PD, Kursar TA. 2011 Is extrafloral nectar production  
560 induced by herbivores or ants in a tropical facultative ant–plant mutualism?.  
561 *Oecologia* **165**, 417–425. (doi:10.1007/s00442-010-1787-x)
- 562 43. Wilson EO. 1987 The arboreal ant fauna of Peruvian Amazon forests: a first  
563 assessment. *Biotropica* **19**, 245–251. (doi: 10.2307/2388342)
- 564 44. Wilson EO. 2003 *Pheidole in the New World: a dominant, hyperdiverse ant genus*  
565 vol. 1. Cambridge, MA, USA: Harvard University Press.
- 566 45. Blüthgen N, Verhaagh M, Goitía W, Jaffé K, Morawetz W, Barthlott W. 2000  
567 How plants shape the ant community in the Amazonian rainforest canopy: the key  
568 role of extrafloral nectaries and homopteran honeydew. *Oecologia* **125**, 229–240.  
569 (doi: 10.1007/s004420000449)



- 570 46. Altmann J. 1974 Observational study of behavior: sampling methods. *Behaviour*  
571 **49**, 227–267. (doi:10.1163/156853974X00534)
- 572 47. Valadares L, Nascimento FS. 2017 Changes in the cuticular hydrocarbon profile  
573 associated with the molting cycle correlate with the hydrocarbon profile of the  
574 fungus cultivated by the ant *Atta sexdens*. *Insectes Soc.* **64**, 591–596.  
575 (doi:10.1007/s00040-017-0581-8)
- 576 48. Young HP, Schal C. 1997 Cuticular hydrocarbon synthesis in relation to feeding  
577 and developmental stage in nymphs of *Blattella germanica* (Dictyoptera:  
578 Blattellidae). *Ann. Entomol. Soc. Am.* **90**, 655–663. (doi:10.1093/aesa/90.5.655)
- 579 49. R Core Team (2017) R: a language and environment for statistical computing. R  
580 foundation for statistical computing, Vienna.
- 581 50. Ross GN. 1966 Life-history studies on Mexican butterflies. IV. The ecology and  
582 ethology of *Anatole rossi*, a myrmecophilous metalmark (Lepidoptera:  
583 Riodinidae). *Ann. Entomol. Soc. Am.* **59**, 985–1004. (doi:10.1093/aesa/59.5.985)
- 584 51. DeVries PJ. 1991 Evolutionary and ecological patterns in myrmecophilous  
585 riodinid butterflies. In *Ant-plant interactions* (eds. CR Huxley, Cutler DF), pp.  
586 143–156. Oxford, UK: Oxford University Press.
- 587 52. Vander Meer RK, Morel L. 1998 Nestmate recognition in ants. In *Pheromone*  
588 *communication in social insects: ants, wasps, bees and termites* (eds RK Vander  
589 Meer, MD Breed, KE Espelie, M Winston), pp. 79–103. Boulder, CO, USA:  
590 Westview Press.
- 591 53. Witte V, Leingärtner A, Sabaß L, Hashim R, Foitzik S. 2008 Symbiont microcosm  
592 in an ant society and the diversity of interspecific interactions. *Anim. Behav.* **76**,  
593 1477–1486. (doi:10.1016/j.anbehav.2008.05.010)

- 594 54. Witek M, Casacci LP, Barbero F, Patricelli D, Sala M, Bossi S, Maffei M,  
595 Woyciechowski M, Balletto E, Bonelli S. 2013 Interspecific relationships in co-  
596 occurring populations of social parasites and their host ants. *Biol. J. Linn. Soc.*  
597 **109**, 699–709. (doi:10.1111/bij.12074)
- 598 55. Parmentier T, Dekoninck W, Wenseleers T. 2017 Arthropods associate with their  
599 red wood ant host without matching nestmate recognition cues. *J. Chem. Ecol.* **43**,  
600 644–661. (doi:10.1007/s10886-017-0868-2)
- 601 56. Seraphim N, Kaminski LA, DeVries PJ, Penz CM, Callaghan CJ, Wahlberg N,  
602 Silva-Brandão KL, Freitas AVL. 2018. Molecular phylogeny and higher  
603 systematics of metalmark butterflies (Lepidoptera: Riodinidae). *Syst. Entomol.*  
604 **43**, 407–425. (doi: 10.1111/syen.12282)
- 605 57. DeVries PJ. 1997 *The butterflies of Costa Rica and their natural history, vol. II:*  
606 *the Riodinidae*. Princeton, NJ, USA: Princeton University Press.
- 607 58. DeVries PJ, Poinar GO. 1997 Ancient butterfly–ant symbiosis: direct evidence  
608 from Dominican amber. *Proc. R. Soc. B* **264**, 1137–1140. (doi:  
609 10.1098/rspb.1997.0157).
- 610 59. Kaminski LA, Carvalho-Filho FS. 2012 Life history of *Aricoris propitia*  
611 (Lepidoptera: Riodinidae) — a myrmecophilous butterfly obligately associated  
612 with fire ants. *Psyche* **2012**, 1–10.
- 613 60. Hojo MK, Pierce NE, Tsuji K. 2015 Lycaenid caterpillar secretions manipulate  
614 attendant ant behavior. *Curr. Biol.* **25**, 2260–2264. (doi:  
615 10.1016/j.cub.2015.07.016)
- 616 61. Sakata H. 1995 Density-dependent predation of the ant *Lasius niger*  
617 (Hymenoptera: Formicidae) on two attended aphids *Lachnus tropicalis* and

- 618            *Myzocallis kuricola* (Homoptera: Aphididae). *Res. Popul. Ecol.* **37**, 159–164.  
619            (doi:10.1007/BF02515816)
- 620        62. Fischer MK, Hoffmann KH, Völkl W. 2001 Competition for mutualists in an ant–  
621            homopteran interaction mediated by hierarchies of ant attendance. *Oikos* **92**, 531–  
622            541. (doi:10.1034/j.1600-0706.2001.920314.x)
- 623        63. Steiger S, Schmitt T, Schaefer HM. 2010 The origin and dynamic evolution of  
624            chemical information transfer. *Proc. R. Soc. B* **278**, 970–979.  
625            (doi:10.1098/rspb.2010.2285)
- 626        64. Lima LD. 2019 Chemical cues. In *Encyclopedia of animal cognition and behavior*  
627            (eds J Vonk, T Shackelford), pp. 1–3. Cham, Switzerland: Springer Nature.  
628            (doi:10.1007/978-3-319-47829-6\_842-1)
- 629        65. Lima LD, Assis DS, Nascimento FS, Kaminski LA. Data from: On the adaptive  
630            meaning of chemically insignificant cues in multitrophic caterpillar-ant-plant  
631            symbioses. Figshare. (doi: 10.6084/m9.figshare.20119952.v1)
- 632        66. Lima LD, Assis DS, Nascimento FS, Kaminski LA. On the adaptive meaning of  
633            chemically insignificant cues in multitrophic caterpillar-ant-plant symbioses.  
634            Figshare.  
635

Multitrophic “*Juditha molpe*–*Dolichoderus bispinosus*–*Inga*” symbiosis

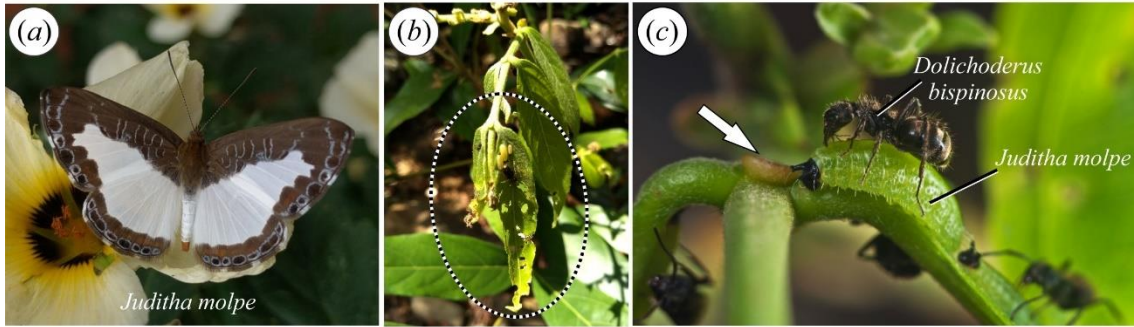

Multitrophic “*Nymphidium chione*–*Pheidole biconstricta*–*Inga*” symbiosis

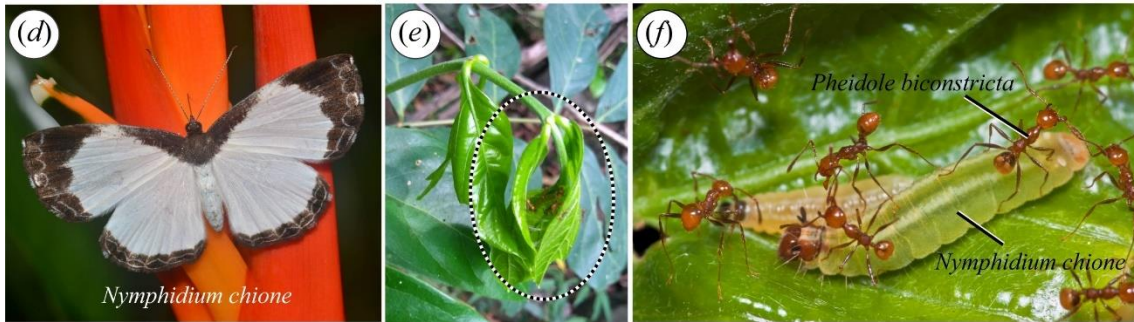

636

637 **Figure 1.**

638

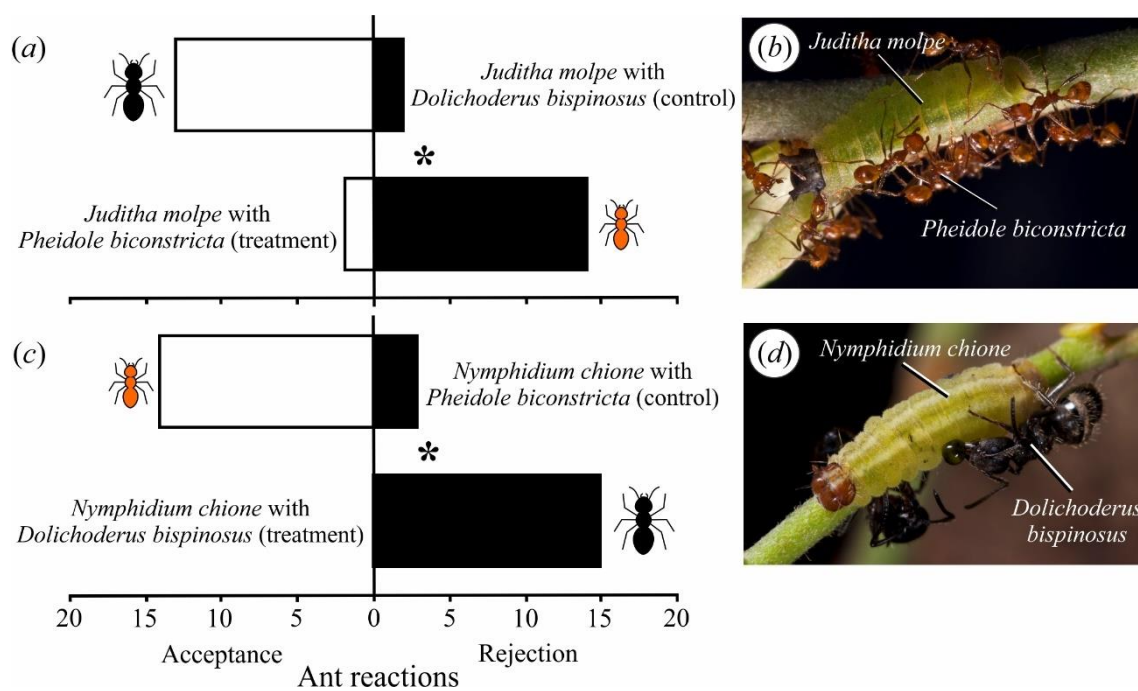

639

640 **Figure 2.**

641

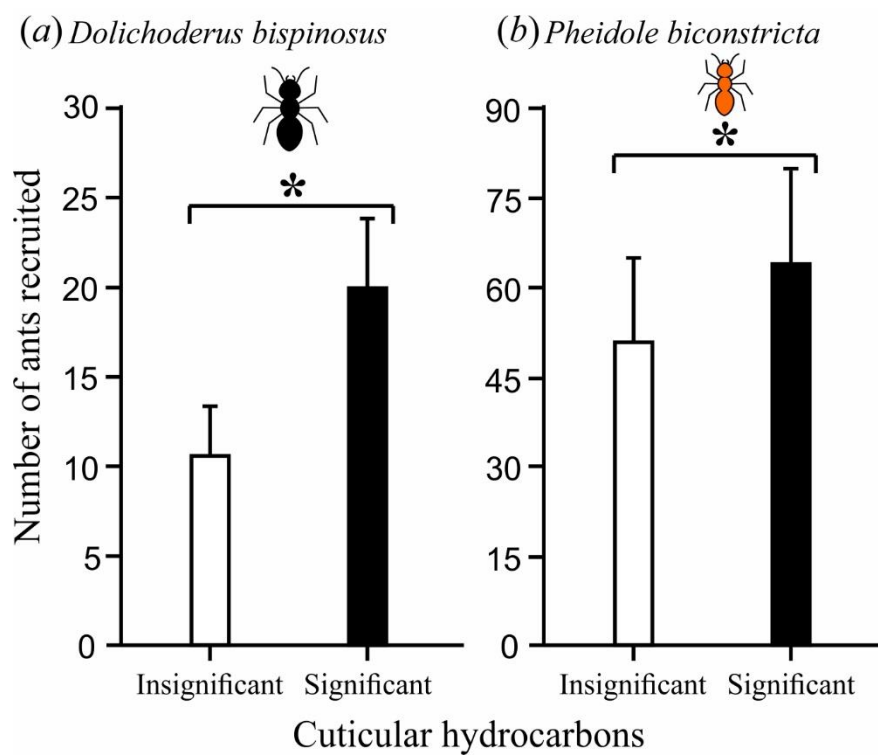

642

643 **Figure 3.**

644

645 **Figure legends**

646

647 **Figure 1.** The studied multitrophic caterpillar-ant-plant symbioses: (a) *Juditha molpe*  
648 adult; (b) *Inga* branch with *J. molpe* caterpillars and *Dolichoderus bispinosus* ants  
649 (dashed ellipse); (c) detail of *J. molpe* caterpillars and *D. bispinosus* ants, note the *Inga*  
650 extrafloral nectary (white arrow); (d) *Nymphidium chione* adult; (e) *Inga* branch with *N.*  
651 *chione* caterpillars and *Pheidole biconstricta* ants (dashed ellipse); (f) detail of *N. chione*  
652 caterpillars and *P. biconstricta* ants. Photos by J. Movia<sup>©</sup> (a), H. Soares Júnior<sup>©</sup> (c,f), and  
653 by L.L. Mota<sup>©</sup> (d).

654

655 **Figure 2.** Ant reactions in ant acceptance of caterpillar experiments on *Inga* spp. (a)  
656 *Juditha molpe* caterpillars with associated tending ant *Dolichoderus bispinosus* (control)  
657 and with non-associated *Pheidole biconstricta* (treatment); (b) detail of *J. molpe*  
658 caterpillar attacked by *P. biconstricta* workers; (c) *Nymphidium chione* caterpillars with  
659 associated tending ant *P. biconstricta* (control) and with non-associated *D. bispinosus*  
660 (treatment); (d) detail of caterpillar attacked by *D. bispinosus* workers, note the  
661 hemolymph droplet leaking through the caterpillar tegument. (\*) = significant values ( $\chi^2$   
662 = 35.41;  $df = 1$ ;  $p < 0.001$ ). Photos by H. Soares Júnior<sup>©</sup> (b,d).

663

664 **Figure 3.** Number of ants recruited in bioassays with palatable model prey (larvae of  
665 *Tenebrio molitor*): chemically insignificant (with reduction of cuticular hydrocarbons,  
666 white bars) and chemically significant (with cuticular hydrocarbons, black bars). (a)

667 *Dolichoderus bispinosus*; (b) *Pheidole biconstricta*. Values are means  $\pm$  SE; (\*) =  
668 significant values ( $\chi^2 = 53.31$ ;  $df = 13$ ;  $p < 0.001$ ).
